# Supplementary material for: Validation of a modified visual analogue scale to measure user-perceived comfort of a lower-limb exoskeleton
Source: PubMed Central journal article supplement (PMC10665473; doi:10.1038/s41598-023-47430-z), 2023-11-22
Supplement: 41598_2023_47430_MOESM1_ESM.pdf [file 41598_2023_47430_MOESM1_ESM.pdf]

## Supplemental Figures and Tables

**Supplementary Table 1.** The minimum and maximum answer, the answer range, the repeatability coefficient (*RC*), and the percentage of trials with a consistent relative response (Cons) for each subject and question. The *RC* is often around the same magnitude as the range of the responses to each question.

| Sub | Question 1 |          |            |         |          | Question 2 |          |            |         |          |
|-----|------------|----------|------------|---------|----------|------------|----------|------------|---------|----------|
|     | Min (mm)   | Max (mm) | Range (mm) | RC (mm) | Cons (%) | Min (mm)   | Max (mm) | Range (mm) | RC (mm) | Cons (%) |
| 1   | 28         | 60       | 32         | 32      | 44       | 30         | 60       | 30         | 33      | 11       |
| 2   | 33         | 46       | 13         | 13      | 56       | 28         | 51       | 23         | 17      | 44       |
| 3   | 53         | 80       | 27         | 19      | 60       | 52         | 78       | 26         | 19      | 60       |
| 4   | 21         | 99       | 78         | 57      | 22       | 15         | 90       | 75         | 82      | 67       |
| 5   | 42         | 91       | 49         | 46      | 38       | 47         | 91       | 44         | 40      | 38       |
| 6   | 13         | 100      | 87         | 76      | 38       | 0          | 100      | 100        | 85      | 38       |
| 7   | 7          | 69       | 62         | 36      | 89       | 4          | 78       | 74         | 49      | 67       |
| 8   | 49         | 100      | 51         | 55      | 44       | 41         | 89       | 48         | 56      | 33       |
| 9   | 34         | 55       | 21         | 17      | 22       | 13         | 48       | 35         | 31      | 33       |
| 10  | 51         | 77       | 26         | 26      | 44       | 21         | 73       | 52         | 55      | 56       |
| 11  | 35         | 72       | 37         | 35      | 44       | 42         | 72       | 30         | 19      | 22       |
| 12  | 24         | 66       | 42         | 30      | 44       | 34         | 73       | 39         | 32      | 44       |
| 13  | 12         | 41       | 29         | 26      | 44       | 12         | 46       | 34         | 23      | 67       |
| 14  | 46         | 71       | 25         | 19      | 78       | 15         | 86       | 71         | 37      | 67       |

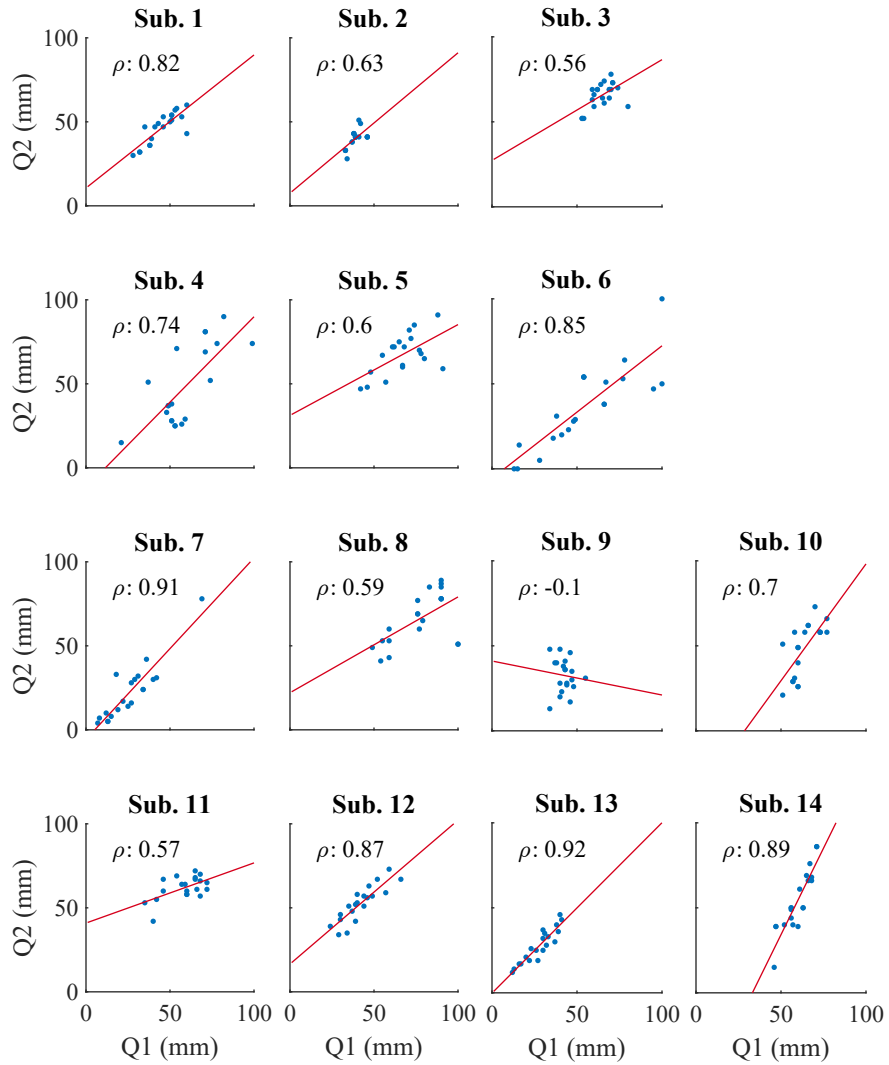

**Supplementary Figure 1.** Correlation plots between Q1 and Q2 for each subject. Most subjects displayed a strong positive correlation between both questions.

**Supplementary Figure 2.** Plots of normalized VAS answers (Eq. 4) for each subject and cycle. For 11 of the 14 subjects, the most comfortable control parameters changed between cycles 1 and 2. This implies that subjects were adapting to the exoskeleton over the course of the experiment, which in turn changed their perceived comfort.

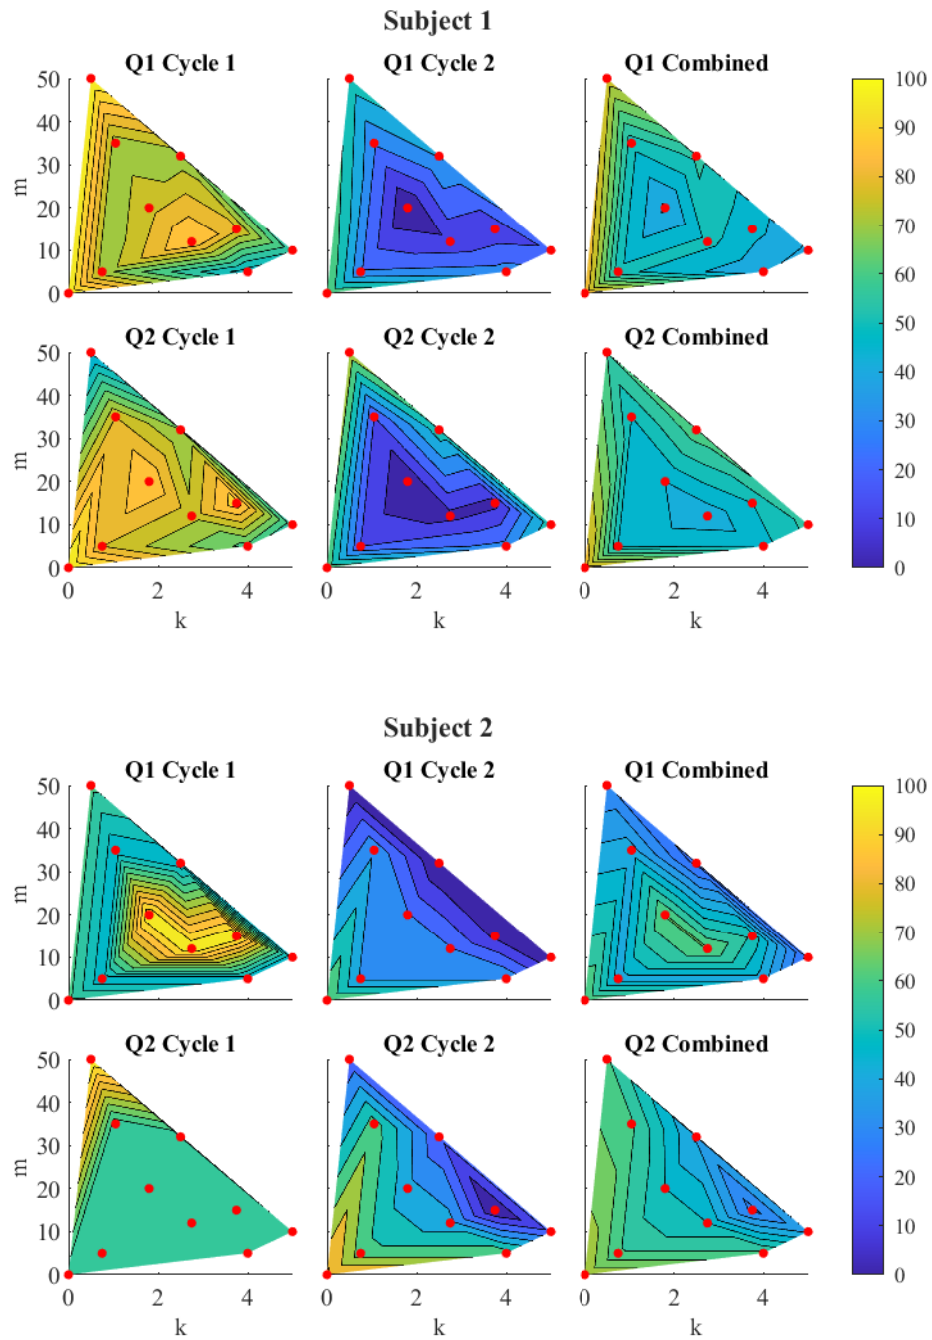

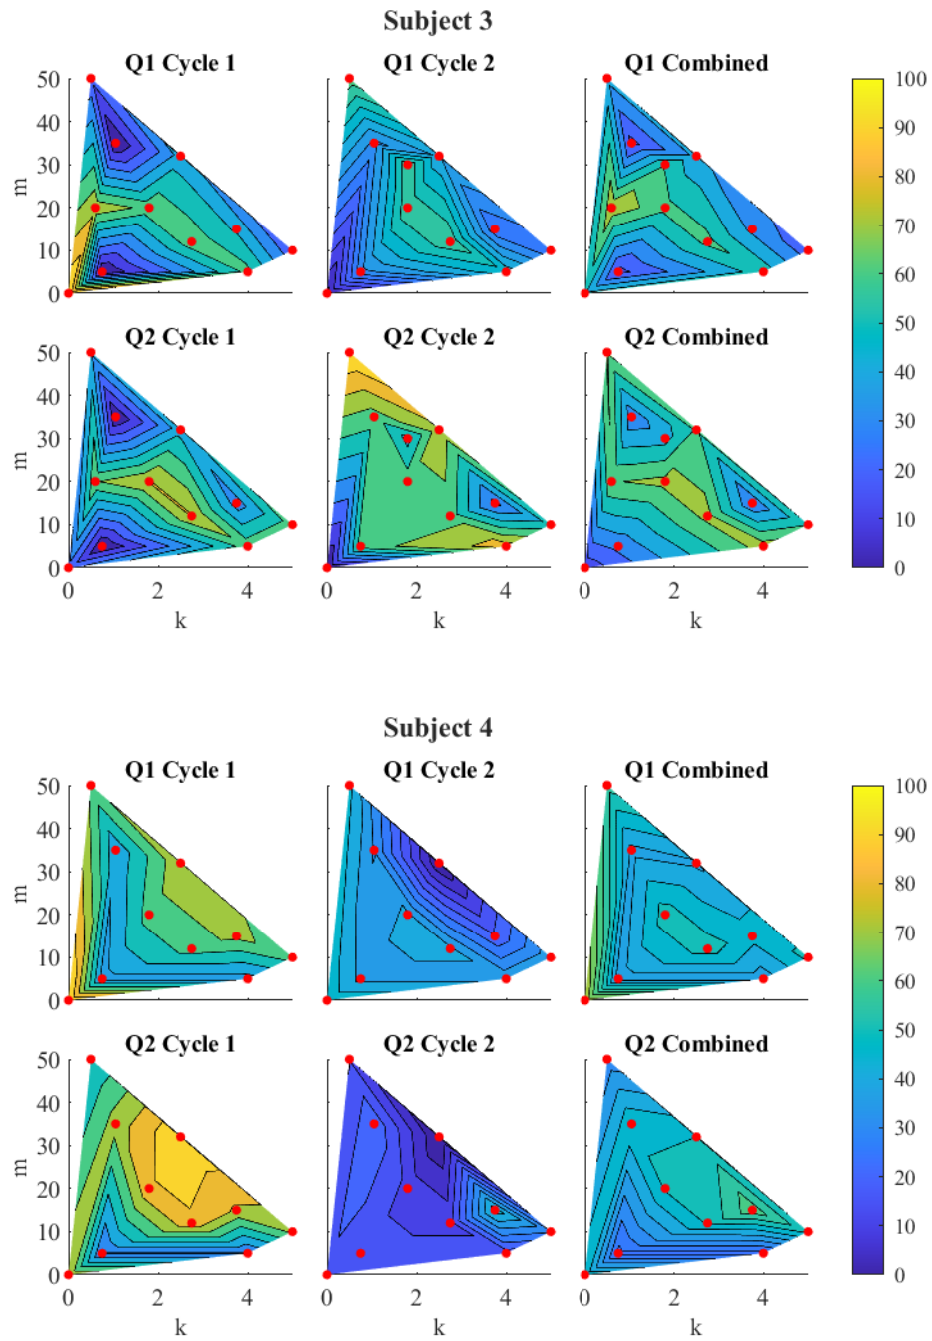

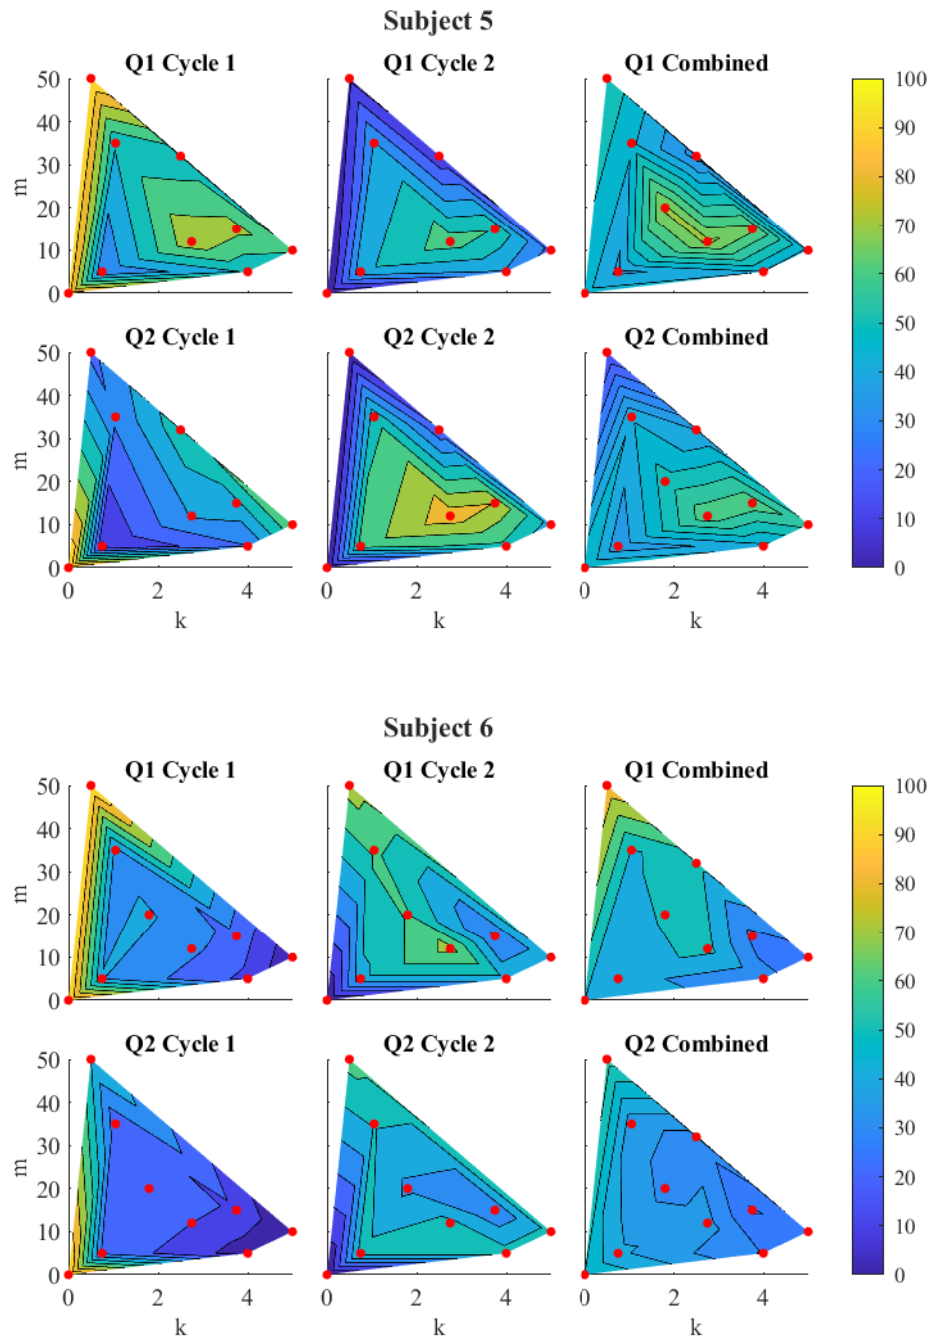

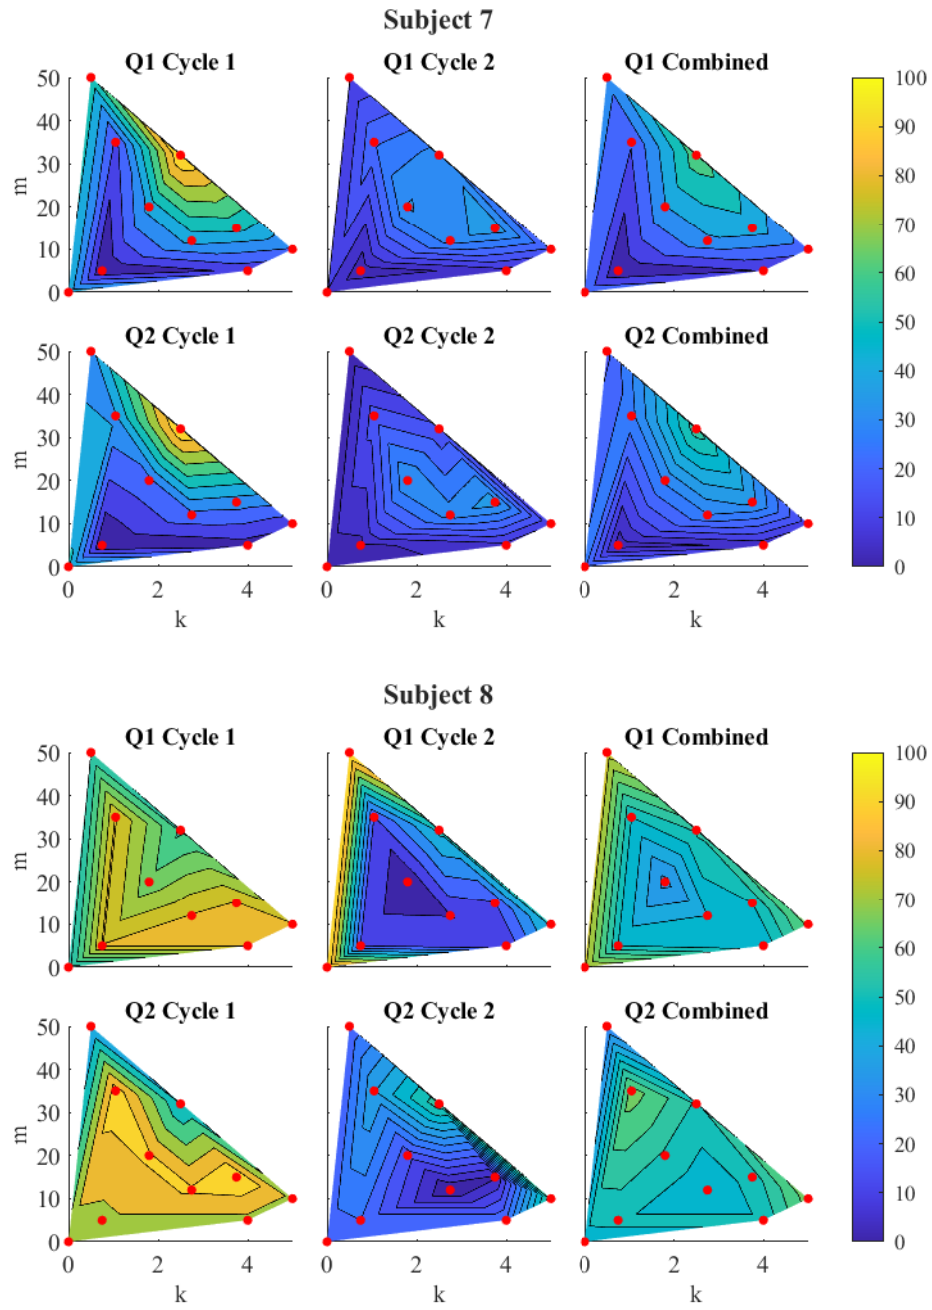

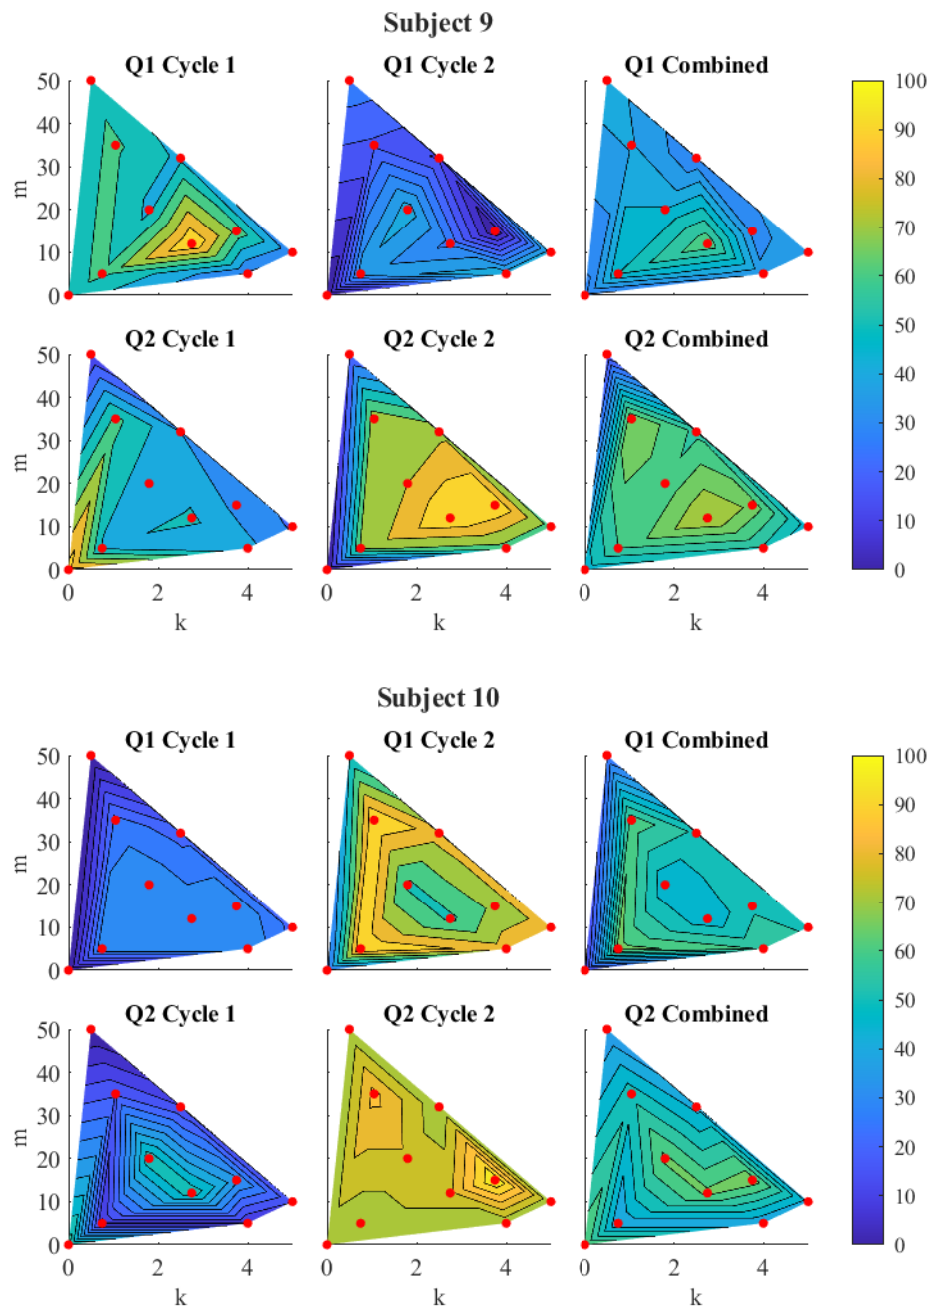

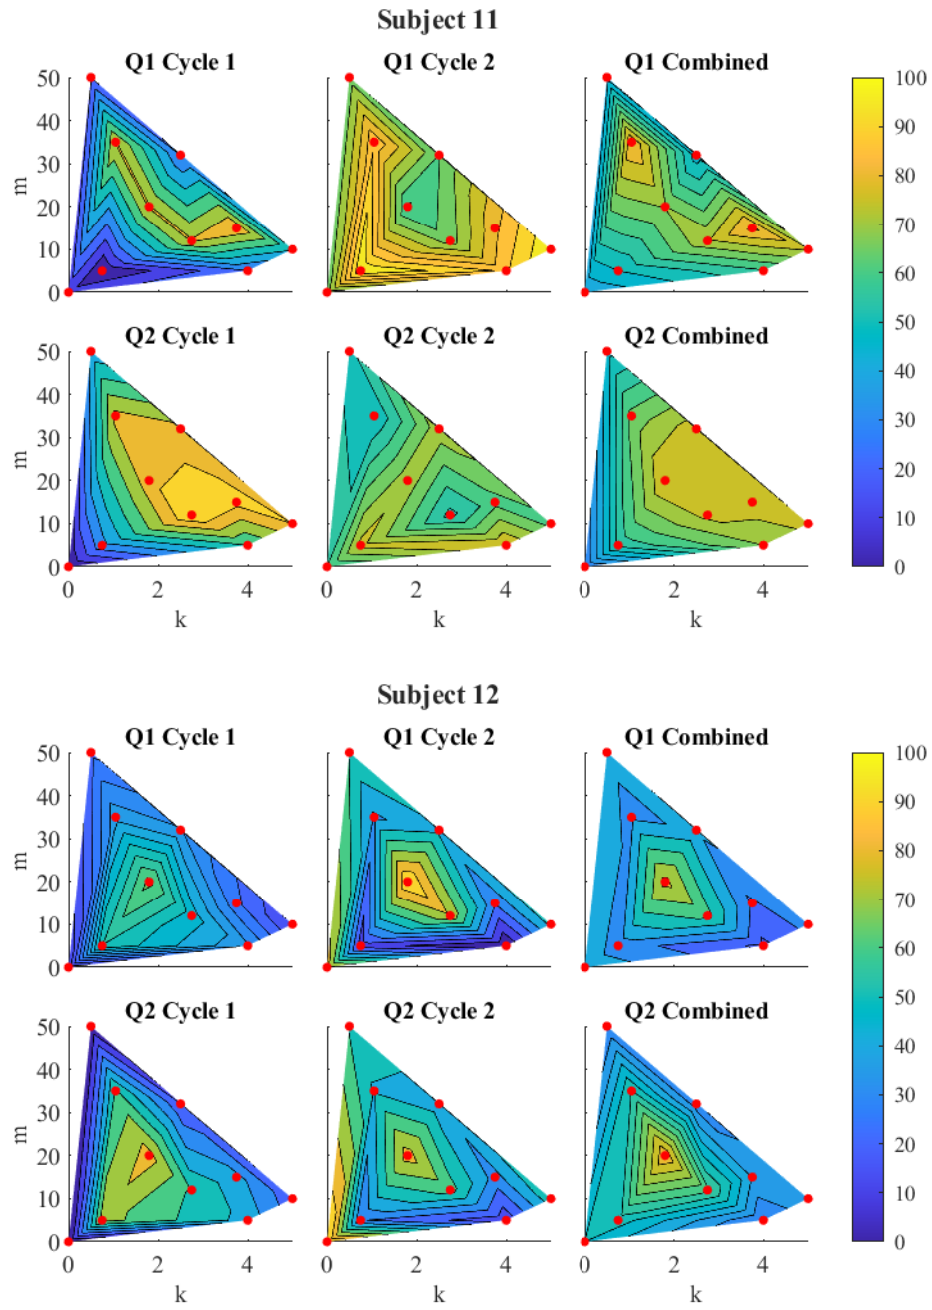



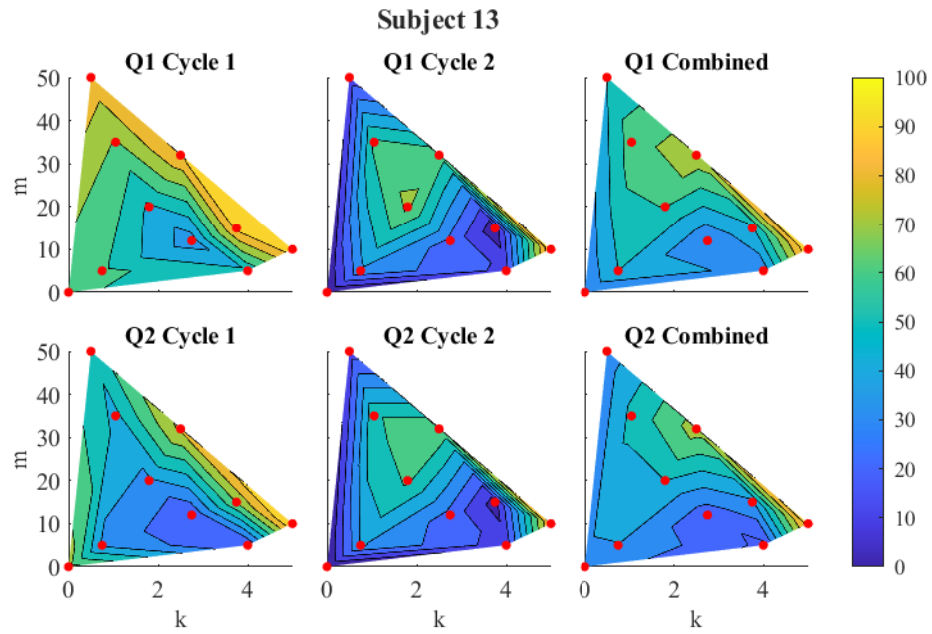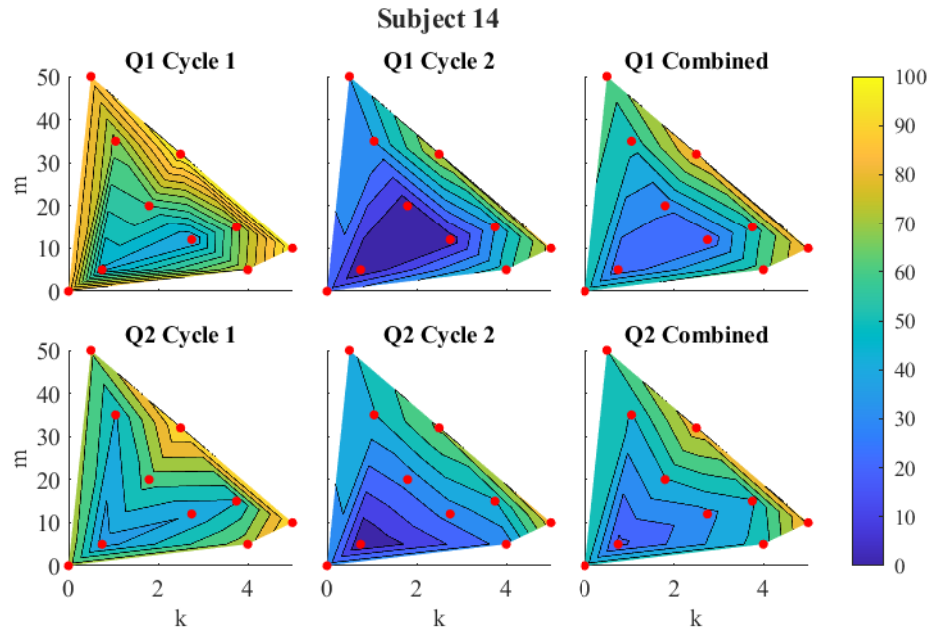

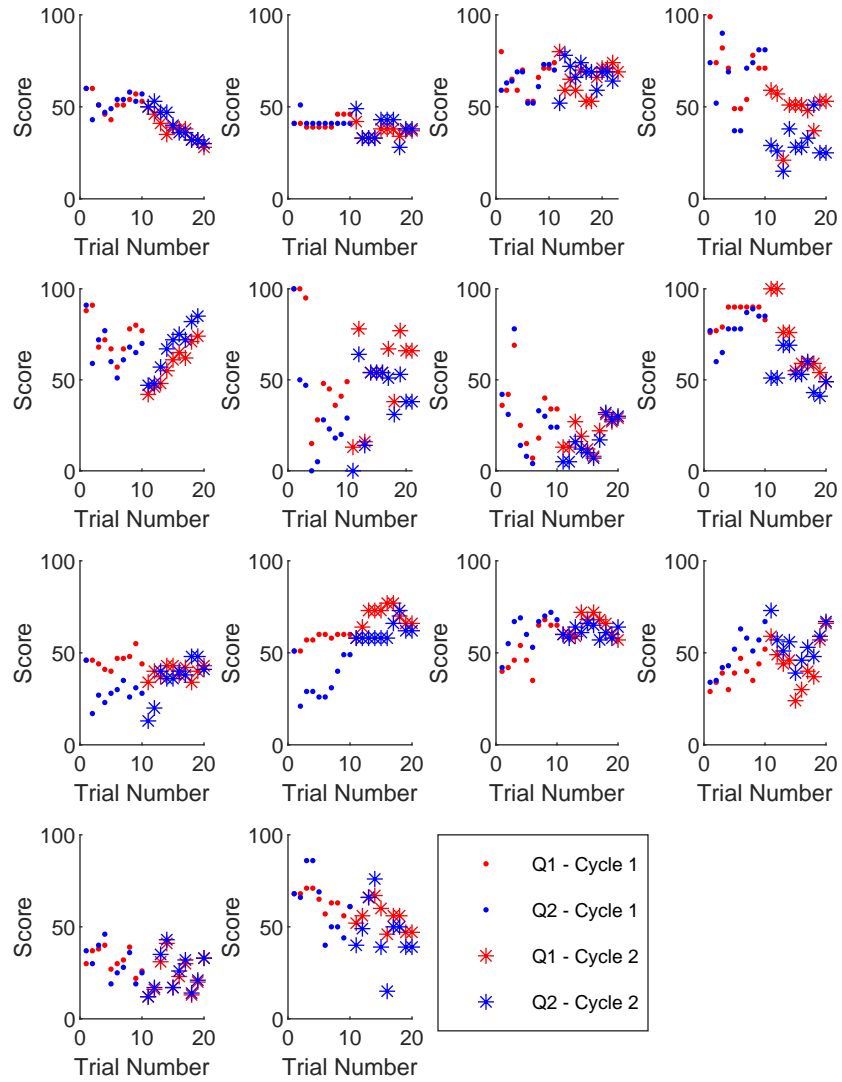

**Supplementary Figure 3.** Plots of question responses in sequential order. As expected, most subjects' answers did not consistently trend either up or down.
